# Supplementary material for: Synthesis, characterization, and application of Cu2O and NiO nanoparticles supported on natural nanozeolite clinoptilolite as a heterogeneous catalyst for the synthesis of pyrano[3,2-b]pyrans and pyrano[3,2-c]pyridones
Source: Royal Society of Chemistry journal article supplement (doi:10.1039/c4ra10537k), 2014-10-23
Supplement: c4ra10537k1.pdf [file c4ra10537k1.pdf]

## Supporting information

### **Synthesis, characterization and application of Cu<sub>2</sub>O and NiO nanoparticles supported onto natural nanozeolite clinoptilolite as heterogeneous catalyst for the synthesis of pyrano[3,2-*b*]pyrans and pyrano[3,2-*c*]pyridones**

Seyed Meysam Baghbanian\*

*Department of Chemistry, Ayatollah Amoli Branch, Islamic Azad University, P.O. Box 678, Amol, Iran.*

*E-mail: [s.m.baghbanian@iauamol.ac.ir](mailto:s.m.baghbanian@iauamol.ac.ir) / [s.baghbanian@gmail.com](mailto:s.baghbanian@gmail.com)*

*Tel.: +98-1143217000; Fax: +98-1143217071*

**The N<sub>2</sub> adsorption-desorption isotherms for nano CP, AT-Nano CP, nano Cu<sub>2</sub>O-CP and nano NiO-CP**

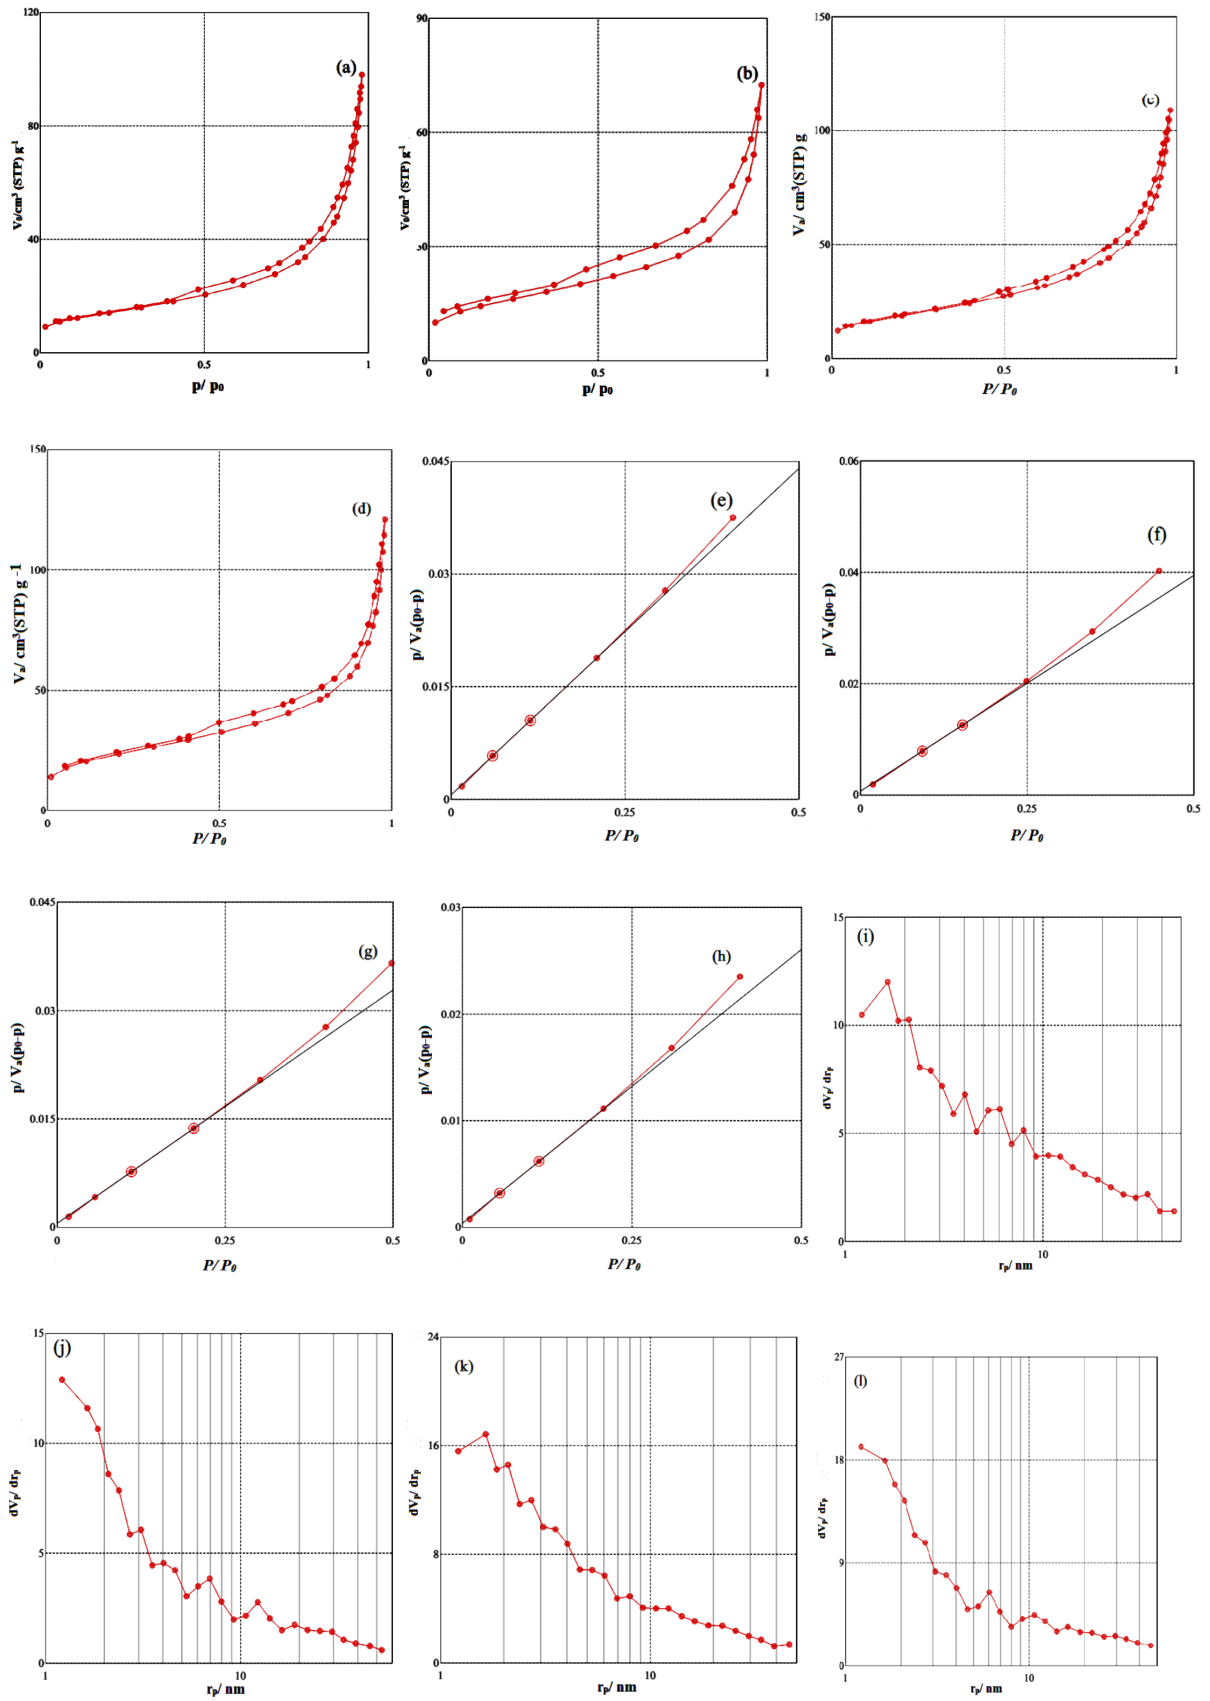

**Fig 2.**  $N_2$  adsorption/desorption isotherms of (a) Nano CP, (b) AT-Nano CP, (c) Nano  $Cu_2O$ -CP and (d) Nano NiO-CP. BET pore size distribution curves of (e) Nano CP, (f) AT-Nano CP, (g) Nano  $Cu_2O$ -CP and (h) Nano NiO-CP. BJH pore size distribution curves of (i) Nano CP, (j) AT-Nano CP, (k) Nano  $Cu_2O$ -CP and (l) Nano NiO-CP
